# Supplementary material
Source: PubMed Central journal article supplement (PMC6827332)
Supplement: NIHMS1046091-supplement-S2.pdf [file NIHMS1046091-supplement-S2.pdf]

**Table S1** COOLAIR RT-PCR primers

| Species           | Target                 | Round  | Forward primer          | Reverse primer          |
|-------------------|------------------------|--------|-------------------------|-------------------------|
| <i>A. lyrata</i>  | FLC-1 COOLAIR proximal | PCR 1  | GCACTGAGAGAGCCACGTTT    | ATGTGGGAGCAGAAGCTGAG    |
|                   |                        | Nest 1 | TGCAAAATAGGCCGTAGGCT    | TCCGACAATCTTCCGGTGAC    |
|                   |                        | Nest 2 | TAGGCCGTAGGCTTCTTCAC    | GTGACTCTCCCGCTGCTTAT    |
|                   | FLC-1 COOLAIR distal   | PCR 1  | ACTGAGAGAGCCACGTTTCT    | ACCTTCTCCAAACGTGCGAA    |
|                   |                        | Nest 1 | TGCAAAATAGGCCGTAGGCT    | GTCGCTCTTCTCGTCTGCTC    |
|                   |                        | Nest 2 | GCCGTAGGCTTCTTCACAGT    | CTCCTCCGGCGATAAGTACG    |
| <i>B. rapa</i>    | FLC-3 COOLAIR proximal | PCR 1  | TAGACGGTAGGCTTCTTCGC    | CGCTATGTATTTGAATGGTTGGT |
|                   |                        | Nest 1 | CGGTAGGCTTCTTCGCCAT     | CGGGAGCCGAAGCTGATAAT    |
|                   |                        | Nest 2 | GAACACACAAGCACACTCACT   | CACCTGGACAAATCTCCGACA   |
|                   | FLC-3 COOLAIR distal   | PCR 1  | GGCCACGTCTCCGTTACAAA    | GCCACTTGAACCGAACCTCT    |
|                   |                        | Nest 1 | TAGACGGTAGGCTTCTTCGC    | GGCACAGAGACCACCTTGGAG   |
|                   |                        | Nest 2 | AGAACACACAAGCACACTCAC   | CGCTTCTCGTTGTCTCCTCC    |
| <i>C. rubella</i> | FLC COOLAIR proximal   | PCR 1  | ATTGTGCCACGCCTCCATT     | TGTTTCCAAACCTTAGAACCCCT |
|                   |                        | Nest 1 | AGCAGAAAGGCTTCTTCACTGT  | ACCTGCTGGACAAATCTCCG    |
|                   |                        | Nest 2 | TCACTGTGAAGGAAACACAAAGA | CTCCGACAATCTTCCGGTGA    |
|                   | FLC COOLAIR distal     | PCR 1  | CCACGCCTCCATTGCAAAAT    | AATTAGGGCACAGGGGGCTC    |
|                   |                        | Nest 1 | ACACACAACATGTGCATGCAA   | CATCCGTGCTCTTCTCGTC     |
|                   |                        | Nest 2 | TGCAAAAACCTCTCCCTCGGA   | TCTACAGTTCTCCTCCGGT     |

**Table S2** COOLAIR touchdown RT-PCR conditions

| Round  | Step                 | Conditions                             | Cycles                 |
|--------|----------------------|----------------------------------------|------------------------|
| PCR 1  | Initial denaturation | 95 °C 2 min                            | 1                      |
|        | Denaturation         | 95 °C 30 s                             | 3, 3, 3, 23 (35 total) |
|        | Annealing            | 68 °C, 65 °C, 62 °C, 59 °C, 56 °C 30 s |                        |
|        | Elongation           | 72 °C 1 min                            |                        |
|        | Final extension      | 72 °C 5 min                            | 1                      |
| Nest 1 | Initial denaturation | 95 °C 2 min                            | 1                      |
|        | Denaturation         | 95 °C 30 s                             | 5, 5, 20 (30 total)    |
|        | Annealing            | 65 °C, 60 °C, 55 °C 30 s               |                        |
|        | Elongation           | 72 °C 1 min                            |                        |
|        | Final extension      | 72 °C 5 min                            | 1                      |
| Nest 2 | Initial denaturation | 95 °C 2 min                            | 1                      |
|        | Denaturation         | 95 °C 30 s                             | 5, 5, 25 (35 total)    |
|        | Annealing            | 65 °C, 60 °C, 55 °C 30 s               |                        |
|        | Elongation           | 72 °C 1 min                            |                        |
|        | Final extension      | 72 °C 5 min                            | 1                      |
