# Supplementary material
Source: PubMed Central journal article supplement (PMC6827332)
Supplement: NIHMS1046091-supplement-S3.pdf [file NIHMS1046091-supplement-S3.pdf]

**Table S3. Related to Figure 2; Secondary structure inventory for *COOLAIR* and rRNA demonstrates RHT is rare.**

| <b>Motif class</b>                                            | <b>Secondary structure motif</b>            | <b>COOLAIR</b> | <b>rRNA</b> |         |
|---------------------------------------------------------------|---------------------------------------------|----------------|-------------|---------|
| Stem-loop ( $N_{loop}$ )                                      | (4) 'Tetra-loop'                            | 12             | 2,090,699   |         |
|                                                               | (5) 'Penta-loop'                            | 7              | 587,429     |         |
|                                                               | (6)                                         | 7              | 600,565     |         |
|                                                               | (7)                                         | 2              | 561,844     |         |
|                                                               | (8)                                         | 8              | 540,589     |         |
|                                                               | (9)                                         | 1              | 300,355     |         |
|                                                               | (12)                                        | 1              | 33,305      |         |
|                                                               | (13)                                        | 1              | 17,891      |         |
| Symmetric internal loop ( $N_5, N_3$ )                        | (1,1)                                       | 23             | 30,196      |         |
|                                                               | (2,2)                                       | 2              | 57,225      |         |
|                                                               | (3,3)                                       | 1              | 109,286     |         |
|                                                               | (4,4)                                       | 1              | 2,238       |         |
|                                                               | (5,5)                                       | 1              | 7,734       |         |
|                                                               | (8,8)                                       | 1              | 474         |         |
| 5'-Asymmetric internal loop ( $N_5, N_3$ )                    | (1,0)                                       | 31             | 243,345     |         |
|                                                               | (2,0)                                       | 1              | 201,580     |         |
|                                                               | (2,1)                                       | 1              | 51,966      |         |
|                                                               | (3,0)                                       | 2              | 28,408      |         |
|                                                               | (3,1)                                       | 1              | 31,621      |         |
|                                                               | (4,0)                                       | 1              | 208         |         |
|                                                               | (4,1)                                       | 9              | 24,818      |         |
|                                                               | (4,2)                                       | 2              | 26,854      |         |
|                                                               | (4,3)                                       | 1              | 26,761      |         |
|                                                               | (5,3) (e.g., 23S Kink-turn 15)              | 1              | 178         |         |
|                                                               | (5,4)                                       | 1              | 2,048       |         |
|                                                               | (6,5)                                       | 1              | 27,907      |         |
|                                                               | (7,0)                                       | 1              | 416         |         |
|                                                               | 3'-Asymmetric internal loop ( $N_5, N_3$ )  | (0,1)          | 21          | 197,409 |
| (0,2)                                                         |                                             | 13             | 38,468      |         |
| (1,2)                                                         |                                             | 14             | 70,146      |         |
| (0,3)                                                         |                                             | 9              | 56,255      |         |
| (1,3)                                                         |                                             | 7              | 28,772      |         |
| (2,3)                                                         |                                             | 5              | 11,350      |         |
| (2,6)                                                         |                                             | 2              | 1,129       |         |
| (2,7)                                                         |                                             | 1              | 5           |         |
| (0,4)                                                         |                                             | 2              | 808         |         |
| (1,4)                                                         |                                             | 2              | 104         |         |
| (2,4)                                                         |                                             | 1              | 27,571      |         |
| (3,4)                                                         |                                             | 1              | 58,260      |         |
| (3,6)                                                         |                                             | 1              | 28,829      |         |
| (4,5)                                                         |                                             | 1              | 38,611      |         |
| (4,7)                                                         |                                             | 1              | 15          |         |
| (0,5)                                                         |                                             | 1              | 305         |         |
| (1,5)                                                         |                                             | 1              | 27,991      |         |
| Multiway junction                                             |                                             | 3WJ            | 7           | 532     |
|                                                               |                                             | 4WJ            | 1           | 3,371   |
|                                                               |                                             | 5WJ            | 5           | 4,129   |
| Right-hand turn ( $N_5, N_3$ ), $N_5 > 12$ , $N_5/N_3 \geq 4$ | $13 \leq N_5 \leq 20$ ; $0 \leq N_3 \leq 4$ | 17 (12)        | 13          |         |
